# Supplementary material for: Ma Xing Shi Gan Decoction Protects against PM2.5‐Induced Lung Injury through Suppression of Epithelial‐to‐Mesenchymal Transition (EMT) and Epithelial Barrier Disruption
Source: Hindawi journal article supplement (doi:10.1155/2020/7176589), 2020-01-01
Supplement: f1 [file 7176589.f1.pdf]

1 **Ma Xing Shi Gan Decoction protects against PM2.5 induced**  
2 **lung injury through suppression of epithelial-to-**  
3 **mesenchymal transition (EMT) and epithelial barrier**  
4 **disruption**

5 Ye-fang Wang<sup>1‡</sup>, Yu-xiang Fei<sup>2‡</sup>, Bo Zhao<sup>2</sup>, Qi-yang Yin<sup>2</sup>, Jian-ping Zhu<sup>2</sup>, Guang-hui  
6 Ren<sup>2</sup>, Bo-wen Wang<sup>2</sup>, Wei-rong Fang<sup>2\*</sup>, Yun-man Li<sup>2\*</sup>

7

8

9

10

11

12

13 <sup>1</sup> Department of paediatrics, Nanjing Integrated Traditional Chinese and Western  
14 Medicine Hospital, Nanjing 210014, PR China

15 <sup>2</sup> State Key Laboratory of Natural Medicines, School of Basic Medical Sciences and  
16 Clinical Pharmacy, China Pharmaceutical University, Nanjing 210009, PR China

17 <sup>‡</sup>These two authors contributed equally to this work.

18

19

20

21

22

23

24

25 Correspondence should be addressed to Wei-rong Fang; weirongfang@163.com and  
26 Yun-man Li; yunmanlicpu@163.com

27 **Supplementary Materials:**

28 **1. Methods**

29 **1.1. Oral toxicity assay of Ma Xing Shi Gan Decoction (MXD) in mice**

30 SPF ICR mice (23±2 g, half male and half female) purchased from Comparative  
31 Medical Centre of Yangzhou University were randomly divided into control group and  
32 intervention group. Mice in intervention group were orally administered with MXD at  
33 40 g/kg/day (0.2 mL/10 g body weight), which was about 30 times of the dosage in  
34 clinical application. Mice in control group were administered with the same volume of  
35 normal saline. The drug was administered for 7 consecutive days. Mice were weighed  
36 daily to evaluate the effect of drugs on body weight. After the experimental period (7  
37 days), mice were starved for 24 h. Then, rats were sacrificed and the organs including  
38 heart, liver, spleen, lung, kidney and brain were removed from sacrificed mice. All  
39 organs were washed in normal saline, sucked dry, weighted and observed with the  
40 naked eye. Organ coefficient was calculated as follows:

41 
$$\text{Organ coefficient} = \frac{\text{The wet weight of respective organ (g)}}{\text{Body weight (g)}}$$

42 **1.2. Oral toxicity assay of MXD in rats**

43 The rats in control group and intervention group (16.4 g/kg) used for H&E staining  
44 in the main body of the text were also used for the toxicity assay. The fixed tissues  
45 (heart, liver, spleen, kidney, brain) were sliced into 5-µm sections and then H&E  
46 staining was conducted. Sections were observed using a light microscope (Olympus,  
47 Japan, BX53) by a researcher blinded to the grouping.

48 **1.3 Masson staining**

49 To verify the successful establishment of lung fibrosis, lung collagen deposition  
50 was determined by Masson staining as described previously with slight modification  
51 [1]. The same batch of fixed lung tissues were used for H&E staining and Masson  
52 staining. Sections (4 µm) were prepared and stained with Masson's trichrome. Briefly,  
53 paraffin sections were dewaxed, followed by washing with distilled water. Sections  
54 were then stained with Weigert hematoxylin for 10 min for nuclei identification. After  
55 fully washing with distilled water, slides were incubated with Ponceau Masson Acid  
56 fuchsin solution for 10 min. Sections were then briefly immersed in a 0.5% aqueous  
57 acetic acid solution for 15 s and incubated with 1% phosphomolybdic acid for 5 min,  
58 followed by direct staining with aniline blue or light green liquid dye for 5 min. After  
59 an immersion in 1% acetic acid for 1 min, sections were dehydrated with 95% ethanol

60 (5 min×2) and 100% ethanol (5 min×2), and transparent xylene (5 min×2) and then  
61 cemented with neutral gum. Sections were observed using a light microscope (Olympus,  
62 Japan, BX53) by a researcher blinded to the grouping.

#### 63 **1.4 Western blot**

64 The expression of collagen I and collagen III were quantified with specific rabbit  
65 polyclonal antibodies: anti-collagen I (Wanleibio, Shenyang, China; dilution 1:800)  
66 and anti-collagen III (Wanleibio, Shenyang, China; dilution 1:800). Western blot was  
67 conducted as described in section 2.17.

#### 68 **1.5 Identification of primary alveolar type II cell**

69 Primary alveolar type II cell was identified by immunocytochemistry against  
70 pulmonary-surfactant associated protein (SPA), the marker of alveolar type II cell.  
71 Briefly, isolated primary alveolar type II cell were seeded onto a cell slide at  $5 \times 10^4$ /slide  
72 and cultured for 24 h, after which cells were washed twice with PBS, fixed with 4%  
73 paraformaldehyde for 30 min and permeabilized with 0.1% Triton X-100 in PBS for 10  
74 min. Slides were then incubated with 3% hydrogen peroxide solution at room  
75 temperature for 30 min followed by 30 min with normal goat serum to block  
76 endogenous peroxidase and non-specific staining. Cells were then incubated at room  
77 temperature for 2 h with anti-SPA (Abbkine, Wuhan, China). Slides were washed twice  
78 with PBS and then incubated with Goat Anti-Rabbit IgG HRP (Abways, Shanghai,  
79 China, dilution 1:500) at room temperature for 30 min. A peroxide reaction using  
80 diaminobenzidine as a substrate was performed. Slides were counterstained with  
81 hematoxylin and observed under a light microscope (Olympus, Japan, BX53).

#### 82 **1.6 Statistical analysis**

83 Data were visualized using GraphPad Prism 5.0. All statistical analyses were  
84 performed using SPSS 19.0 software and analysed by One-way analysis of variance  
85 (ANOVA) followed by LSD post hoc test (variance homogeneity) to compare the  
86 difference between groups. When the variance was heterogeneous, Welch's ANOVA  
87 would be introduced followed by Games Howell test. A value of  $P < 0.05$  was considered  
88 as statistically significant.

### 89 **2. Results**

#### 90 **2.1 MXD showed no obviously toxic side effect in mice and rats**

91 During the period of drug delivery, no whole-body reaction or death was observed.  
92 As shown in Supplementary FIGURE 1(a) to (c). Compared with control group, no  
93 significant changes in body weight, organ coefficient or morphology of main organs

94 were observed in intervention group, preliminarily indicating administration with MXD  
 95 for 7 consecutive days showed no apparent toxicity in mice.

96 As shown in Supplementary FIGURE 1(d), H&E staining of rat tissue samples  
 97 showed that there was no evident pathological change nor inflammatory cell infiltration  
 98 in tissue sections, indicating the satisfying safety of MXD in this study.

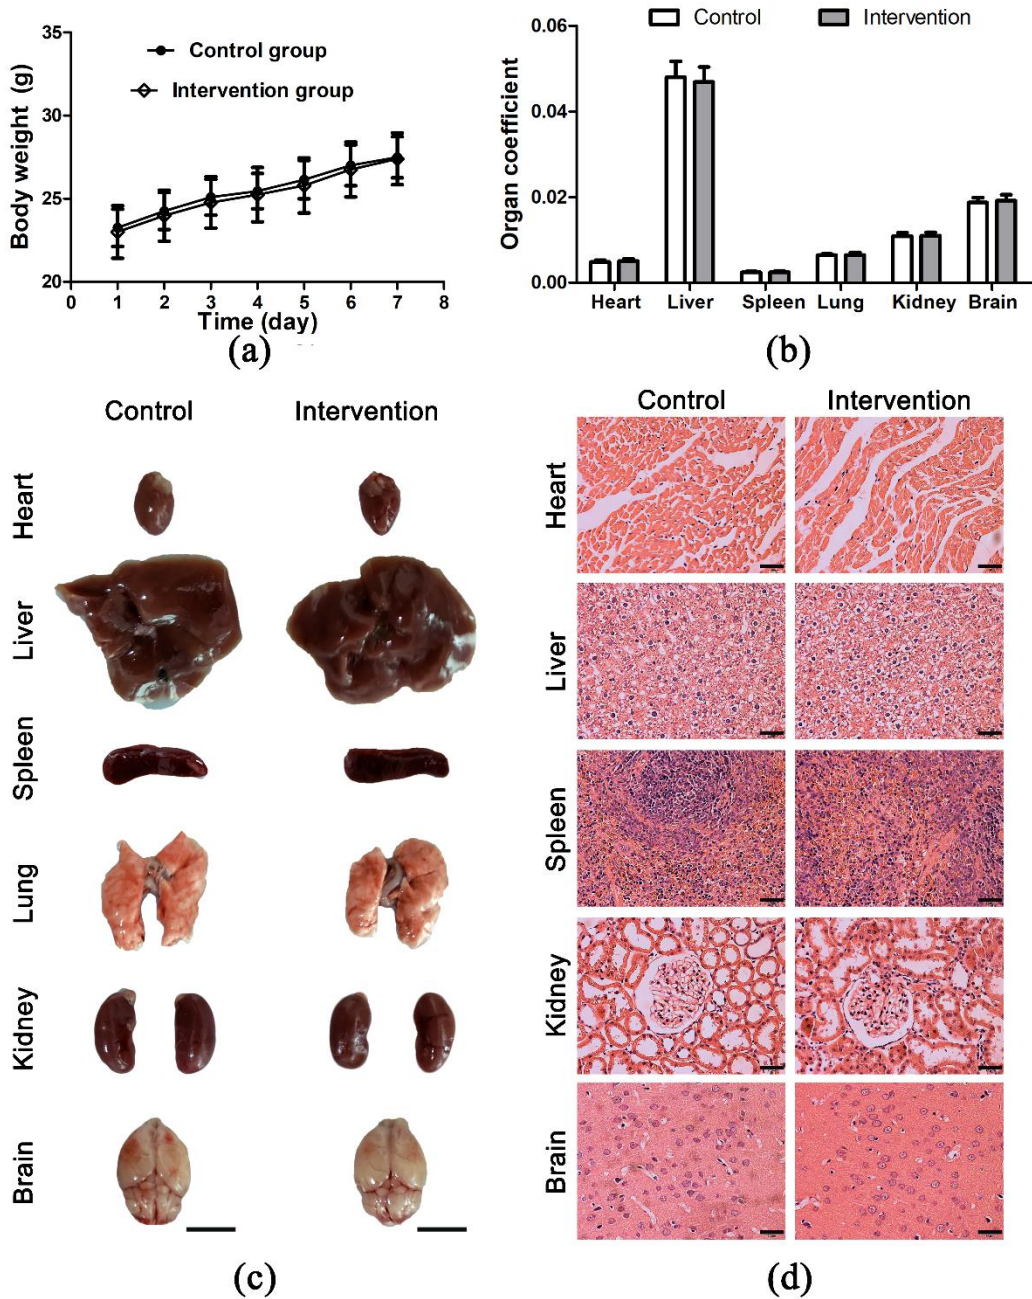

99

100 Supplementary FIGURE 1. MXD showed no obvious toxicity in mice and rats. (a) Body  
 101 weight changes in mice (n=10). (b) Mice organ coefficient (n=10). (c) Examination of

102 main organs in mice with naked eyes (Scale bar=1 cm). (d) H&E staining sections of  
103 main organs in rats (Scale bar, 20  $\mu$ m). Data are shown as mean  $\pm$  SD.

## 104 **2.2 MXD inhibited the collagen deposition in lung tissue**

105 As shown in Supplementary FIGURE 2 (a), Masson staining revealed that marked  
106 lung fibrosis was induced after PM2.5 exposure. Compared with the control group, the  
107 collagen deposition (blue areas) was significantly higher in PM2.5 group. In  
108 comparison with PM2.5 group, administration with MXD significantly attenuated the  
109 accumulation of collagen fibre in lung tissues.

110 Moreover, as shown in Supplementary FIGURE 2 (b) to (c), compared with control  
111 group, the lung fibrosis was further evidenced by the increased expression of collagen  
112 I and collagen III in PM2.5 group. Administration with MXD at 16.4 g/kg significantly  
113 downregulated the expression of collagen I and collagen III ( $P<0.05$  and  $P<0.01$ ),  
114 indicating the anti-fibrotic benefit of MXD.

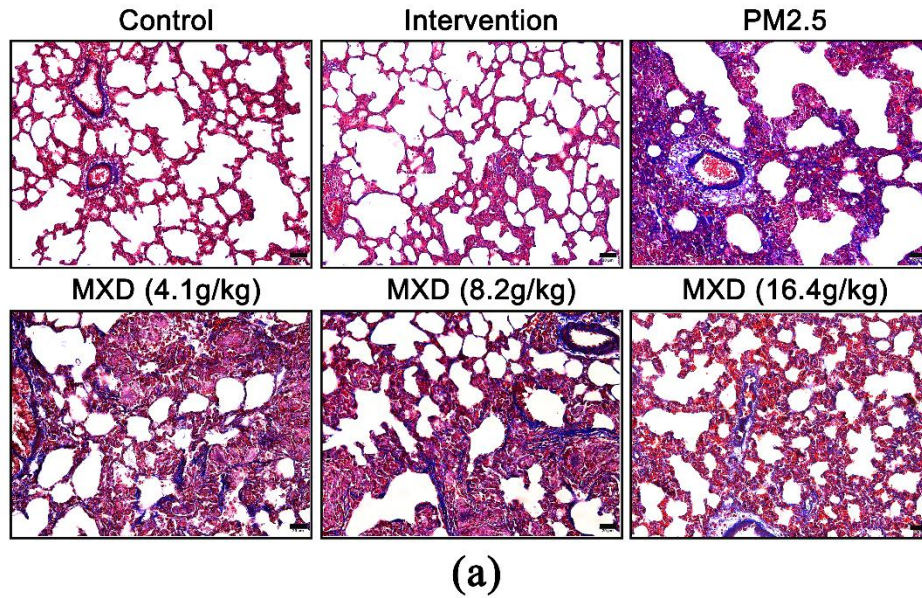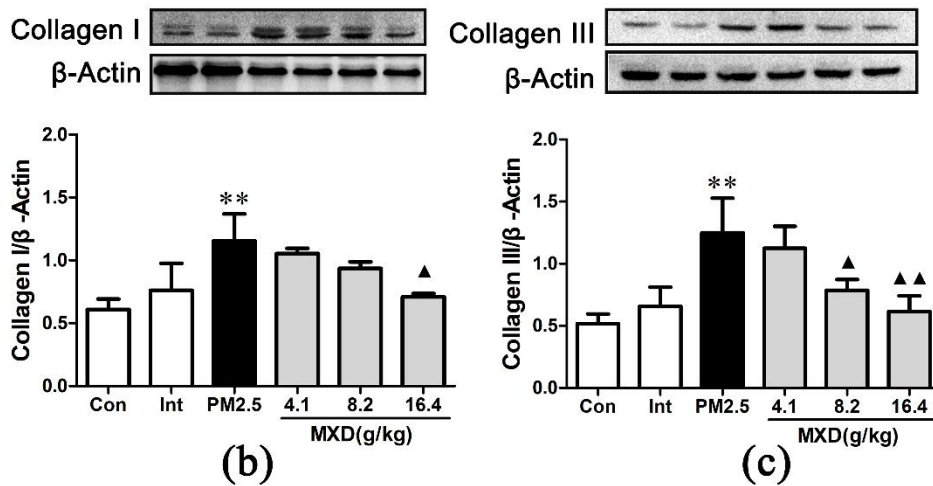

115

116 Supplementary FIGURE 2. MXD inhibited PM2.5-induced collagen deposition and the  
 117 expression of collagen I and III in rat lungs. (a) Masson staining in rat lungs, scale bar=  
 118 20  $\mu\text{m}$ . The expression of collagen I (b) and collagen III (c) in lungs. Data are shown  
 119 as mean  $\pm$  SD. \*\* $P < 0.01$  vs. control group;  $\blacktriangle P < 0.05$ ,  $\blacktriangle\blacktriangle P < 0.01$  vs. PM2.5 group.

### 120 2.3 Primary alveolar type II cell was identified by SPA expression

121 As shown in Supplementary FIGURE 3, majority of isolated cells showed SPA  
 122 positive immunoreaction, indicating the purity of primary alveolar type II cell basically  
 123 meet the design requirements.

Pulmonary-surfactant  
associated protein

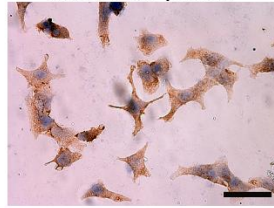

124

125 Supplementary FIGURE 3. Immunocytochemistry staining of SPA in primary alveolar  
126 type II cell (Scale bar=30  $\mu$ m)

127 **References**

128 [1] Y. Jing, H. Zhang, Z. Cai, Y. Zhao, Y. Wu, X. Zheng, Y. Liu, Y. Qin, M. Gu, J. Jin, Bufe  
129 huoxue capsule attenuates PM<sub>2.5</sub>-induced pulmonary inflammation in mice, Evidence-Based  
130 Complementary and Alternative Medicine 2017 (2017).

131
